# Supplementary material for: Pregnancy in a healthy population: dynamics of NTproBNP and hs-cTroponin T
Source: PubMed Central journal article supplement — Open Heart. 2020 Oct 19;7(2):e001293. doi: 10.1136/openhrt-2020-001293 (PMC7574935; doi:10.1136/openhrt-2020-001293), 2020-10-19
Supplement: openhrt-2020-001293supp001.pdf [file openhrt-2020-001293supp001.pdf]

## Appendix

Hypertensive disease (preeclampsia or pregnancy induced hypertension) and normotensive participants. Median and interquartile range.

|                              | PE<br>n=3              | PIH<br>n=4            | Normotensive<br>n = 172 | p-value |
|------------------------------|------------------------|-----------------------|-------------------------|---------|
| Age                          | 24 (n.a)               | 33 (10)               | 30 (6)                  | 0.393   |
| BMI, 10-12 gw                | 25 (n.a)               | 27 (7.8)              | 24 (5.4)                | 0.389   |
| Smoking                      | none                   | none                  | none                    | Na      |
| BPs, 10-12 gw                | 110 (n.a)              | 129 (6)               | 113 (12)                | 0.007†  |
| BPd, 10-12 gw                | 65 (n.a)               | 78 (12)               | 65 (10)                 | 0.076   |
| NTproBNP, 10-12 gw<br>range  | 38 (n.a)<br>24–120     | 84 (152.5)<br>27–196  | 57 (46.8)<br>5–312      | 0.770   |
| Hs-cTNT, 10-12 gw<br>range   | <5.0 (n.a)<br><5.0–5.8 | <5.0 (0)<br><5.0–<5.0 | <5.0 (0)<br><5.0–6.1    | 0.001†† |
| eGFR, 10-12 gw<br>range      | 105 (n.a)<br>97–109    | 102 (17)<br>92–112    | 110 (12)<br>71–139      | 0.129   |
| BPs, 20-25 gw                | 124 (n.a)              | 132 (25)              | 116 (12)                | 0.043‡  |
| BPd, 20-25 gw                | 72 (n.a)               | 80 (4)                | 68 (9)                  | 0.003‡  |
| NTproBNP, 20-25 gw<br>range  | 27 (n.a)<br>21–59      | 58 (167.5)<br>43–265  | 46 (49)<br>7–279        | 0.360   |
| Hs-cTNT, 20-25 gw<br>range   | 5.0 (n.a)<br><5.0–<5.0 | 5.0 (0)<br><5.0–<5.0  | 5.0 (0)<br><5.0–10.5    | 0.978   |
| eGFR, 20-25 gw<br>range      | 115 (n.a)<br>105–118   | 110 (12.8)<br>100–115 | 114 (13)<br>86–143      | 0.656   |
| Cardiac index, 20-25 gw      | 3.0 (n.a)              | 3.2 (1.2)             | 3.1 (0.7)               | 0.962   |
| NTproBNP peripartum<br>range | n.a<br>19–50           | 52 (n.a)<br>29–302    | 44 (52)<br>5–990        |         |
| Hs-cTNT peripartum<br>range  | n.a<br><5–5.7          | 5.2 (n.a)<br>5.2–11.7 | 5.2 (2.5)<br><5–30.5    |         |

|                     |           |           |          |
|---------------------|-----------|-----------|----------|
| eGFR peripartum     | 106 (n.a) | 103 (n.a) | 101 (16) |
| range               | 83–107    | 78–112    | 70–125   |
| NTproBNP postpartum | 38 (n.a)  | 70 (n.a)  | 52 (47)  |
| range               | 17–65     | 36–99     | 6–305    |
| Hs-cTNT postpartum  | <5 (n.a)  | <5 (n.a)  | <5 (0)   |
| range               | <5–<5     | <5–<5     | <5–11.7  |
| eGFR postpartum     | 85 (n.a)  | 96 (n.a)  | 93 (13)  |
| range               | 81–93     | 70–104    | 62–120   |

PE= preeclampsia. PIH= pregnancy induced hypertension. BMI=body mass index. Gw=gestational week. BPs=systolic blood pressure. Bpd=diastolic blood pressure. eGFR=estimated glomerular filtration rate (ml/min/1.73). n.a=not applicable. All comparisons below are Bonferroni-adjusted significance tests for pairwise comparisons by using Kruskal-Wallis mean rank tests.

† PE vs. PIH,  $p = 0.033$ , PE vs. NT,  $p = 1.00$ , NT vs. PIH,  $p = 0.007$ .

†† PE vs. PIH,  $p = 0.010$ , PE vs. NT,  $p = 0.001$ , NT vs. PIH,  $p = 1.000$ .

‡ PE vs. PIH,  $p = 1.000$ , PE vs. NT,  $p = 0.571$ , NT vs. PIH,  $p = 0.090$ .

‡‡ PE vs. PIH,  $p = 1.000$ , PE vs. NT,  $p = 0.322$ , NT vs. PIH,  $p = 0.006$ .
